## ***In silico* study predicts a key role of RNA-binding domains 3 and 4 in nucleolin-miRNA interactions.**

**Authors:** Avdar San <sup>1,2</sup>, Dario Palmieri <sup>3</sup>, Anjana Saxena <sup>1,2,4</sup> and Shaneen Singh <sup>\* 1,2,4</sup>

**Affiliation:** <sup>1</sup>Department of Biology, Brooklyn College, The City University of New York, Brooklyn,

New York 11210 <sup>2</sup>The Biochemistry PhD program, The Graduate Center of the City University of New

York, New York, New York 10016; <sup>3</sup>Department of Cancer Biology and Genetics, The Ohio State

University Wexner Medical Center, Columbus, Ohio, 43210<sup>4</sup>; The Biology PhD program, The Graduate

Center of the City University of New York, New York, New York 10016

\*Correspondence:

Corresponding author: Dr. Shaneen Singh,

[ssingh@brooklyn.cuny.edu](mailto:ssingh@brooklyn.cuny.edu)

<http://orcid.org/0000-0002-4003-5756>

## Abstract

RNA binding proteins (RBPs) regulate many important cellular processes through their interactions with RNA molecules. RBPs are critical for post-transcriptional mechanisms keeping gene regulation in a fine equilibrium. Conversely, dysregulation of RBPs and RNA metabolism pathways is an established hallmark of tumorigenesis. Human nucleolin (NCL) is a multifunctional RBP that interacts with different types of RNA molecules, in part through its four RNA binding domains (RBDs). Particularly, NCL interacts directly with microRNAs (miRNAs) and is involved in their aberrant processing linked with many cancers, including breast cancer. Nonetheless, molecular details of the NCL-miRNA interaction remain obscure. In this study, we used an *in silico* approach to characterize how NCL targets miRNAs and whether this specificity is imposed by a definite RBD-interface. Here, we present structural models of NCL-RBDs and miRNAs, as well as predict scenarios of NCL- miRNA interactions generated using docking algorithms. Our study suggests a predominant role of NCL RBDs 3 and 4 (RBD3-4) in miRNA binding. We provide detailed analyses of specific motifs/residues at the NCL-substrate interface in both these RBDs and miRNAs. Finally, we propose that the evolutionary emergence of more than two RBDs in NCL in higher organisms coincides with its additional role/s in miRNA processing. Our study shows that RBD3-4 display sequence/structural determinants to specifically recognize miRNA precursor molecules. Moreover, the insights from this study can ultimately support the design of novel antineoplastic drugs aimed at regulating NCL-dependent biological pathways with a causal role in tumorigenesis.

**Keywords:** Nucleolin, RNA binding domain, miRNA, pri-miRNA, modeling, RNA-Protein docking, RNA Binding Protein

## Introduction

RNA binding proteins (RBPs) are critical in modulating RNA metabolism and linked with erroneous gene regulation in a wide range of disease conditions [1]. The human genome codes for more than 3500 RBPs [2]. Their emerging role is underscored by genome-wide studies indicating that hundreds of these RBPs are significantly dysregulated in a variety of cancer types [3], where some are even identified as potential cancer drivers [4]. In addition, RBPs are implicated in numerous somatic and mendelian genetic diseases, impacting multiple organ systems in humans such as metabolic, neurodegenerative, musculoskeletal and connective tissue diseases [5]. Altered expression or function of RBPs translates into aberrant control of target RNAs, and hence gene expression, ultimately driving pathological phenotypes [6]. RBP-RNA interactions are driven by RNA-binding domains (RBDs) and are often dysregulated in human cancers [6]. Importantly, many RBPs bind the same sub-set of target RNAs, potentially exploiting a synergistic or competitive physiology [7]. However, the molecular mechanisms by which RBPs direct their specificity, including the selective use of their constituent RBDs to target specific RNA types, remain elusive. RBPs are known to interact with RNA molecules through two RNA-binding motifs (RNP1 and RNP2). RNPs within an RBD provide some underlying principles about how an RBP recognizes specific RNA species [8]. RNPs are evolutionarily conserved among many RBPs and correspond to a  $\beta_1$ - $\alpha_1$ - **$\beta_2$** - **$\beta_3$** - $\alpha_2$ - $\beta_4$  structural arrangement [9]. The two beta strands found in the middle of this arrangement (indicated in bold) are known to interact with RNA either as the octameric RNP1 motif with the conserved sequence (R/K)-G-(F/Y)-(G/A)-(F/Y)-V-X-(F/Y) [10] or as the hexameric RNP2 motif with the conserved sequence of (L/I)-(F/Y)-(V/I)-X-(N/G)-L [10]. RNP-RNA interactions are predominantly hydrophobic, and aromatic residues are especially important in mediating the interaction through Van der Waals forces,  $\pi$ - $\pi$  stacking interactions [11] with nucleotide bases and  $\pi$ -sugar ring interactions [11]. Additionally, basic residues in these conserved motifs also form salt bridges with

phosphate groups to enhance stability [10]. Previous studies have established the role of aromatic and basic residues in interactions of hnRNP A1[12-13] and Lin28 [14] with RNA molecules.

Nucleolin (NCL), a multifunctional RBP is often overexpressed in many cancers and disease conditions [15]. NCL is involved in myriads of cellular processes that are ultimately tied to its RNA/DNA-binding functions to regulate gene expression that control cell survival, growth and or death. These roles include sensing stress [16], ribosome biogenesis [17], chromatin remodeling [18], DNA replication, transcription, messenger RNA (mRNA) turnover [19], induction [20] & inhibition [21] of translation, and microRNA (miRNA) biogenesis [22]. NCL protein is organized into distinct functional domains: (a) the highly acidic N-terminal domain with basic stretches that contains the nuclear localization signal, is heavily phosphorylated during the cell cycle by stage-specific kinases and drives the histone chaperone activity of NCL [17]; (b) the glycine and arginine-rich (RGG/GAR) C-terminal domain, known to play a critical role in protein-protein interactions such as with ribosomal proteins [23] and the tumor suppressor p53 [24] and is also implicated in non-specific interactions with RNA; and (c) the central region constitutes two-to-four distinct RNA-binding domains and is critical for its interaction with different species of RNAs [22]. Most eukaryotic species, including plants, contain only two RBDs in NCL protein, where the individual RBD domains are better conserved among the orthologs than within the protein. Interestingly, NCL from *Dictyostelium Discoideum* uniquely possesses an odd number of RBDs (three RBDs) suggesting a unique RNA binding profile in this organism (Singh Lab, unpublished). NCL has evolved in vertebrates, including humans, to an increased (four) number of RBDs where RBDs 3 and 4 are unique to these organisms [25]. It is also well-established that RBDs 1 and 2 are sufficient for certain NCL-RNA interactions, specifically binding to mRNA [26,27] and rRNA molecules [16]. The newly emerged RBD3 and 4 domains suggest potential evolutionary novel functions of NCL in these higher organisms. However, in contrast to RBDs 1 and 2, RBDs 3 and 4 have remained overlooked and understudied.

NCL regulates gene expression by binding both coding (mRNA) and non-coding RNA species (rRNA, miRNA, and lnc RNA). It is well established that NCL interacts with RNA preferentially through stem loop structures including apical loops or hairpin loops [20,27] and AU [18,28]/G rich elements [29,30], both serving as signature sequence or structural motifs for NCL-RNA affinity. In fact, a 7-10 nt long G-rich stem-loop structure called nucleolin recognition element (NRE), found in pre-ribosomal RNA, establishes a primary role of NCL in processing rRNA. Similarly, NCL also demonstrates high affinity for the 11 nt single stranded evolutionary conserved motif (ECM) that contains the sequence UCCCGA sequence, found 5 nt downstream of the pre-rRNA processing site [31]. Additional RNA recognition motifs which NCL is known to interact with include AU rich elements (ARE), G-quadruplex structures in the tumor suppressor *TP53* mRNA [26] and a stem loop forming GCCCGG motif in *GADD45α* mRNA in DNA damage response [30].

NCL-mRNA interactions mediated by its RBDs influence mRNA turnover rate or translation [21,26], while NCL-lnc-RNA binding also has implications in RNA localization [32,33]. Overall, it is clear that NCL-RNA interactions have a profound influence on many cellular processes that control growth, proliferation, and survival.

As a member of the short non-coding RNA molecules, microRNAs (miRNA) are often dysregulated in many cancers where the aberrant miRNA processing is linked to tumorigenesis [34]. Processing of primary-miRNA (pri-miRNA) to precursor-miRNA (pre-miRNA) in animals is mediated via the microprocessor complex (MPC) in the nucleus. The pre-miRNA is then transported to the cytoplasm by shuttle proteins and subsequently processed into its mature form by Dicer [35,36]. In plants, on the other hand, both the pri- and pre-miRNA are processed solely in the nucleus by Dicer-Like1 protein (DCL-1) and a few more helper proteins [37,38]. A similar mechanism also exists in *Dictyostelium Discoidium*, a slime mold species, where the double stranded RNA (dsRNA) binding protein RbdB processes pre-miRNA molecules [39].

NCL is known to interact with the active components, Drosha and DCGR8 in the microprocessor complex [21] and the emergence of NCL-RBD3-4 in higher organisms coincides with the roles of NCL in miRNA processing. We, therefore, propose that the emergence of NCL-RBD3-4 in higher organisms coincides with the NCL role in miRNA processing in evolution and that RBD3-4 possess sequence/structural determinants that specifically recognize miRNA precursor molecules in NCL protein.

The focus of this study is to elucidate the selective preference of specific NCL RBDs for the recognition of miRNAs using an *in silico* approach. Structural information for NCL RBDs and miRNA molecules is either unavailable or limited to partial structures. To fill these structural gaps, in this study we generated 3D models of the human NCL central region containing all 4 RBDs as well as various tandem pairs of RBD, as well as selected miRNAs. Our data include much needed structural models of NCL-RBDs, miRNAs and predicted scenarios of NCL-miRNA interactions from RNA-Protein docking algorithms. Our study suggests a predominant role of NCL RBDs 3 and 4 in miRNA target specificity and provides details about key motifs/residues at the NCL-substrate interface responsible of specific NCL-miRNA interactions. Structural modeling and *in silico* analysis tools provide valuable information to fill in the knowledge gaps and provide a cost effective and rational entry point in experimental design. Ultimately, the insights from this study can lead to future studies for identifying new drug design targets to regulate NCL functions in gene expression during tumorigenesis.

## **Material and Methods**

A flowchart summarizing the general protocol of the present study with the various tools used to analyze NCL-miRNA interactions (discussed in detail below) is shown in the supplementary Figure S1.

### ***Sequence analysis and generation of 3D models of NCL-RBDs***

Since only partial structural information for NCL-RBDs is available, robust 3D models of all 4 NCL RBDs (RBD1-4), and RBD3-4 were built; structural information for RBD1-2 in tandem (PDB ID: 2KRR) [44] and

for individual RBDs (PDB ID: 1FJ7 & 1FJC, respectively) [45] is available for human NCL. The human NCL sequence available from NCBI database [46] was analyzed for its domain architecture using the programs SMART [47], Pfam [48], Uniprot [49], and Interpro [50] to confirm the domain boundaries of the individual RBDs accurately as well as to identify any potential sequence motifs of relevance. The multiple sequence alignment tool Clustal Omega [51] was used to align the NCL-RBDs with hnRNPA1 RBDs to identify conserved residues. The multiple sequence alignment was visualized using the alignment editor Esript3 [52].

Delineated tandem domain pairs were modeled using both template-based methods (Swissmodel [53] Irtfold [54], Phyre2 [55])<sup>9</sup> and *ab initio* modeling approaches (Robetta [56], QUARK [57], and I-TASSER [58]) to generate structural models. To identify high quality models, the constructed models were rigorously evaluated by model verification programs including Verify3D [59], VoroMQA [60], Prosa-web [61], and ProQ3 [62] (Supplementary Tables S1 and S2) and correlation of their biophysical and structural properties with experimental observations. Top models were refined using ModRefiner [63] and SCWRL4 [64] and then re-evaluated. ModRefiner first modifies the protein side chain packing by adding atoms and improves the structural quality of reconstructed models by energy minimization procedures. SCWRL4 focuses on side chain refinements to improve the models. Top scoring models were chosen for further analysis (Supplementary Tables S1 and S2).

### ***Generation of 3D models of miRNA implicated in interactions with NCL***

Structural information of miRNA molecules implicated to play a role in breast cancer (Supplementary Table S3) and interact with NCL is unavailable in the databases. The limited structural data available in the protein databank for the 6 miRNA molecules under study corresponds to either partial pre-miRNA structures or apical loops (PDB ID: 2MNC, 5UZT) [65,66] and neither provide structural information for the complete pri-miRNA structures. Therefore, all pri-miRNA molecules were modeled using the primary

sequences of miRNA stem loop structures obtained from miRbase [67]. The secondary structure of these miRNA molecules was predicted using various programs including RNAStructure [68], RNAFold [69], MC-Fold [70], CentroidFold [71], and SPOT-RNA [72]. Although all these tools provide predictions based on experimental data found in databases, some of the newer methods such as CentroidFold and SPOT-RNA also utilize machine learning in making these predictions. All of the predicted secondary structures (dot bracket format) obtained from these tools were input into the RNA modeling software including RNAComposer [73], ifold2 [74], RNAfold3 [75], 3DRNA v2 [76] and simRNAweb [77] to obtain 3D models of these miRNA molecules. The generated models were evaluated for their structural quality using MolProbity [78] (Supplementary Table S4) . The top models were refined using RNAfitme [79], a program that reconstructs nucleobases and nucleosides while keeping the sugar phosphate backbone fixed and aiming to reduce steric clashes.

### ***Prediction of motifs involved in NCL-miRNA interactions***

NCL-miRNA interactions were investigated using the protein-RNA docking software HDOCK [80] and NPDock [81]. Both programs employ a rigid body docking approach followed by scoring and clustering of structures with the lowest minimum energy followed by refinement of the results through Monte Carlo simulations. Both the programs are considered the top ranked algorithms for protein-RNA docking and score well in benchmarks. The docking results were visualized in PyMOL [82] and the interactions mapped out using Nucplot from PDBSum [83]. The key interacting residues in the NCL-RBDs were identified based on the 10 top scoring scenarios from each docking run. These residues were compared with putative residues of NCL-RBDs identified using catRAPID [84], a program that predicts binding propensity of a protein sequence to a given RNA sequence by measuring physicochemical properties and shape complementarity. Additionally, control docking experiments were conducted with miRNA models (mir-155) which has been shown not to interact with NCL [40]. Similarly, docking experiments



were performed using *in silico* mutagenesis at key residues of NCL identified to be important in NCL-miRNA interactions in the current study.

## Results

### ***3D structural models of NCL RBD1-4, RBD3-4 and specific miRNAs provide a complete structural picture needed to study NCL-miRNA interactions***

The tandem pair of NCL RBD1-2 structure is experimentally resolved (PDB ID: 2KRR) [44] and well characterized for its interactions with various rRNA [16] and mRNAs [26,27]. While individual crystal structures of RBD3 and RBD4 are available, albeit misannotated (PDB IDs: 2FC9 & 2FC8 [85]), the functional role(s) of the NCL RBD3-4 tandem pair remain unresolved and unexplored. Structural information for all the RBDs in NCL are critical to fully understand the mechanistic details about various RNA targets of NCL and the key features that render target-specificity. Lack of structural details on RBD1-4 as a whole and the RBD3-4 tandem pair, pose limitations in dissecting the specificity with which NCL binds to a wide-range of RNA species and plays pivotal role/s in pathophysiology. Therefore, structural models of NCL RBDs and miRNA molecules generated using template based and *ab initio* approaches were analyzed to identify robust models with high evaluation profiles (**Supplementary Tables S1 and S2**) to bridge the gap in NCL RBD structural information. Figure 1 shows that the superposition of the top ranked RBD1-4 (**Figure 1A**) and RBD3-4 (**Figure 1B**) models with the existing individual crystal structures of RBD1, 2, 3 and 4 overlays very well with minor deviations in the loop regions.

Structural information of miRNA molecules is largely unavailable in the current databases. Therefore, 3D miRNA models generated based on secondary structure prediction using 3D modeling programs were evaluated to identify top ranked models (**Figure 2**). Additionally, if multiple models were ranked the same in structural evaluation profiles (**Supplementary Table S4**), they were all used in RNA-Protein

docking analysis to check for reproducibility of results. Our predicted models provide a complete picture of the structural information for both NCL and the miRNA analyzed in this study.

### ***Docking analysis of miRNA with NCL RBDs reveals 3 possible NCL RBD-miRNA interaction scenarios***

Based on our comprehensive analyses of NCL RBDs and a set of NCL-interacting miRNAs suggest 3 possible binding modes between NCL RBDs and miRNA molecules:

#### **Mode 1: Both RBD3 and RBD4 form the RNA-protein interaction interface**

In mode 1 scenario, the interface is built by the contribution of RBD3 with conserved residues on the RNP1 motif (K217, Y219, F221) as well as new interacting residues identified in RBD4 (positively charged residues on  $\beta$ -2 strand (R291, R293)) and on the linker loop between  $\beta$ -2 and  $\beta$ -3 (R298). This binding mode is predicted for the interactions of mir-16, mir-221, and mir-222 with NCL. In this putative binding mode, RBD3 and RBD4 interact with the double stranded RNA from opposite ends and cooperate to hold the miRNA molecule in a clasped orientation (**Figure 3**).

#### **Mode 2: RBD4 forms the major component of the interaction interface**

This binding mode 2 features anticipated residues on RNP1 motif (K304, F306, F308) , the positively charged residues on  $\beta$ -2 strand (R291, R293) of RBD 4, and on the linker loop between  $\beta$ -2 and  $\beta$ -3 (R298). This binding mode is predicted in the mir-15a and mir-103 docking scenarios (**Figure 4**) and suggests the involvement of multiple beta strands from a single RBD, RBD4. The binding mode 2 bears resemblance to the mir-18 binding mode of hnRNP A1 [10] (described in the next section), both in terms of the composition and location of the residues involved in the interaction and in the overall arrangement of the beta strands. In both cases, the interactions are driven by residues on 3 beta strands of the same RBD.

#### **Mode 3: RBD3-4 predominantly drive the interactions with a minor contribution from RBD1-2**

In this mode 3, besides the involvement of both RBD3-4 as predicted in binding mode 1, RBD1-2 is predicted to have a minor contribution by forming salt bridges with the phosphate backbone. This binding mode (**Figure 5**) is only predicted with mir-21 docking scenarios.

***RNP motifs are conserved on all 4 NCL RBDs but RBD-miRNA interactions are driven primarily by RBD 3 and 4***

An alignment of NCL RBDs with the hnRNP A1 shows the conservation of the RNP motifs as well as the key residues that are involved in hnRNP A1-RNA/DNA interactions in all 4 NCL RBDs (**Figure 6A**). However, our docking studies predict the RNP motifs of RBD3-4 are predominantly involved in miRNA interactions (see docking results, Figures 4-6). The aromatic and basic residues of RNP1 (K217, Y219, F221) of RBD3, RNP1 (K304, F306, F308) and RNP2 (F269) of RBD4 were the most frequently predicted RBD residues at the RNA-protein interface (**Figure 6B**). Additionally, the linker region connecting RBD3 to RBD4 contains several residues frequently predicted to be involved in NCL-miRNA interactions (R255, N259, R261, Q263; not shown in the figure).

These results are corroborated by a predictive analysis based solely on primary structure using the Catrapid algorithm that similarly suggests RBD3, RBD4, and the linker region between RBD3-4 have the highest RNA binding propensity for all tested miRNA molecules (**Supplementary Figure S2**). Additionally, we performed a control docking of NCL RBD1-4 with miR-155, a microRNA reported to be not affected by NCL [40]. Interestingly, this docking yields noisy and inconsistent results with no clear selectivity for any particular RBD (**Supplementary Figure S3**), supporting the quality of our *in silico* prediction.

***Aromatic and basic residues play a key role at the NCL RBD3-4-miRNA interface***

RNA-NCL docking scenarios of both RBD3-4 and RBD1-4 with miRNA models highlight the role of some of the positively charged arginine residues in  $\beta$ -2 (R291, R293) as well as the linker between  $\beta$ -2 and  $\beta$ -3 on

RBD4 (R298) as these residues are consistently predicted to be involved in nearly all of the docking scenarios analyzed. These basic residues form salt bridges with the phosphate backbone of the various miRNAs. Similarly, our results indicate that aromatic residues on  $\beta$ -1 (F269 in RBD4) and  $\beta$ -3 (Y219 and F221 in RBD3 & F306 and F308 in RBD4) interact with miRNA molecules through  $\pi$ - $\pi$  stacking and  $\pi$ -anion interactions with the nucleobases and the phosphate backbone, respectively. Importantly, the docking analysis of RBD1-4 models align with those of RBD3-4 models (**Supplementary Figure S4**). Our results also show that residues on RNP motifs from RBD1-2 are largely not involved in NCL RBD-miRNA interactions, despite the similar functional profile of the RNP motifs. A control docking analysis using only RBD1-2 yields noisy scenarios with no clear trend (**Supplementary Figure S5**), again reinforcing the idea that NCL RBD3-4 preferentially interact with the miRNA under study.

Based on the docking results, we show that NCL-RBDs interact with pri-miRNA nucleotides almost exclusively within the region that corresponds to the mature miRNA molecule. In our results, NCL is predicted to interact frequently with G-U pairs and kink turns (Figure 7). Interactions were observed predominantly at the major groove regions of the double stranded miRNA molecules as these regions were more accessible when compared to the minor groove regions.

## Discussion

***NCL RBD3-4 utilize aromatic and basic amino acid enriched RNP motifs to recognize miRNAs, similar to the miRNA binding protein, hnRNP A1***

The importance and functionality of RNP motifs in RBP-RNA interactions are well established in previous studies [10]. Since there is a high sequence similarity between NCL and hnRNP A1 RBDs, and hnRNP A1-RNA interactions are known, an initial and preliminary prediction of putative residues that may be important in NCL-miRNA interactions could be made based on sequence conservation between NCL and hnRNP A1. The RBP-hnRNP A1 interacts with MPC and pri-mir-18 by utilizing aromatic/charged residues

found on its RNP motifs as well as on non-RNP beta strands [10]. These aromatic/charged residues show strong conservation between NCL and hnRNP A1 sequences suggesting existence of a similar RNP-mediated mechanism in NCL-RNA interactions (**Figure 6A**). This study confirms such prediction through detailed docking analyses *in silico*. Our results provide three alternative NCL-miRNA binding possibilities with common underlying conserved residues at an equivalent position as in hnRNP A1-RBD taking part in RNA binding (**Figure 6C**). Aromatic residues in the RNP motifs are known to be capable of initiating interactions with multiple nucleobases at the same time through stacking interactions and promoting structural stability to the RNA-RNP binding motif [11]. We consistently predicted the involvement of these aromatic residues in all binding modes of miRNA-NCL. Additionally, we frequently predicted some charged residues on different beta strands from the same RBDs to be involved in NCL-miRNA interactions. Several arginine residues (R291, R293, and R298) were consistently predicted to interact with phosphate groups on the nucleotides via salt bridges (e.g., R293 with G16 in Fig 3, and with A34, and U45 in the figures for mir-16, mir-221, and mir-222, respectively). These residues provide additional structural stability to RNA-protein interactions similar to previous studies [10]. Our docking results also revealed that each NCL-RBD interacts with the miRNA duplex structure from opposite sides and forms a clasp around it. Linker regions between RBD3 and RBD4 were consistently predicted in several scenarios to hold the miRNA molecule from an additional third side, thus tightening the NCL-RBDs grip on miRNA (**Figures 4-6**).

### ***NCL RBDs are predicted to interact with UGU/GUG motifs on pri-miRNA molecules***

Our results indicate that NCL RBDs demonstrate preference or affinity for interaction with certain types of miRNA motifs. It was previously established that NCL prefers interacting with RNA loops while driving ribosomal biogenesis [86]. Non-canonical base pairing is known to lead to kink-turns, bulges, mismatched pairs, and wobble pairs in miRNA structures and presents suitable interaction sites that would be unavailable otherwise. In canonical pairs such as G-C or A-U, amino groups of each base-pair

are projected into the major groove, creating a region with positive electrostatic potential [87]. The G-U base-pair is an example of non-canonical base pair, where oxygen groups from both nucleotides face the major groove side instead of the amino groups and leading to negative electrostatic potential in the region of the major groove of the dsRNA [87]. Our results also highlighted the preference of NCL RBDs on non-canonical base pairs when interacting with miRNAs (**Figure 7**). Such regions are expected to interact with amino acids with positively charged side groups such as arginine or lysine [87]. This ties in with our results as several arginine and lysine residues from NCL RBD3-4 were predicted as some of the most frequently encountered residues in the various docking scenarios obtained.

Additionally, wobble pairs and mismatched pairs are known to be important elements of primary miRNA processing by the MPC [88]. Certain RNA motifs such as UGU/GUG are known to be enriched around the apical loop regions [89] and the preference of NCL to interact with regions close to the apical loops has been demonstrated in previous studies investigating NCL-rRNA [86] and NCL-mRNA [26] interactions. This consensus sequence is also important in pri-miRNA processing by the MPC as DGCR8 is thought to recognize and interact with this consensus sequence [90]. Our results revealed that NCL RBDs were able to recognize this UGU/GUG motif for all miRNA molecules tested in this study (**Figure 8**). In the cases of mir-15a and mir-103, these regions were identified adjacent to apical loop structures. It is also interesting to note that, in binding mode 2 (observed in mir15a and mir103a), RBD4 by itself seems sufficient to drive NCL-miRNA interactions (**Figure 8A**). In the cases of mir-21 and mir-16-1, NCL interacts with regions distant from apical loops, but closer to bulge regions towards the middle of the miRNA molecule. (**Figure 8B**). Since DGCR8 also recognizes the same motif for interactions, our results suggest that NCL potentially binds adjacent to DGCR8 or could even replace it in as a possible scenario of miRNA – NCL interactions. Alternatively, in the cases of mir-221 and mir-222, NCL-miRNA interactions were predicted to be localized slightly distant to the apical loop region and closer to the basal stem region containing a mismatched GHG/CUC motif (**Figure 8C**). This manifests as a mismatched bulge, which is a

common element in most pri-miRNA structures [90]. Drosha cleaves its miRNA targets around the basal stem close to this motif [91]. This cooperation model suggests that NCL RBDs binds closer to Drosha. In both scenarios, these motifs likely serve as anchoring points for NCL RBDs when they interact with miRNA in cooperation with MPC.

Similarly, multiple other RBPs including hnRNP A1, Lin28B, RBFOX3, and HuR interact with either the terminal loop or the stem regions of the pri-miRNA molecules to either promote or suppress pri-miRNA processing by the MPC proteins depending on the location of the interactions and the targeted miRNA. For example, both Lin28B and hnRNP A1 interact with the terminal loop of a subset of pri-miRNA structures. hnRNP A1 is predicted to help with the processing of pri-miR18-a by binding to the terminal loop and causing a relaxation of the miRNA structure and therefore making it easier for MPC to interact with miRNA [92]. However, when hnRNP A1 interacts with let-7 pri-miRNA terminal loop, it outcompetes binding of another RBP, KH-type slicing regulatory protein (KSRP) known to promote biogenesis of let-7 [92] and decreases pri-miRNA processing by Drosha. Lin28B, on the other hand, always negatively regulates this process by interacting with the terminal loop and inhibiting Drosha from interacting with miRNA [93]. Both RBFOX3 and HuR bind to the basal stem and inhibit miRNA processing by blocking catalytic activity of Drosha [94,95]. Based on these studies, it is clear that the relationship of RBPs with the MPC is both location and context dependent.

***NCL may cooperate with or replace DGCR8 as a dsRBP in pri-miRNA processing of different types of miRNAs***

A recent structural study investigating interactions of the MPC with pri-miR16-2 revealed that 2 DGCR8 proteins interact with nucleotides adjacent to the apical loop region of the pri-miRNA molecule [96]. Canonical function of DGCR8 is to interact with pri-miRNA using its double stranded RNA binding domains (dsRBDs) and present the pri-miRNA molecules to Drosha for processing [96]. This is illustrated

in **Figure 9A**. Many RBPs can interact with regions of pri-miRNA molecules that are also regions where DGCR8 proteins bind. We speculate that NCL-RBDs promotes pri-miRNA processing of certain miRNAs by a similar mechanism as observed in hnRNP A1-mir18 interactions. As a RBP capable of binding double stranded RNA molecules, NCL could potentially replace the pri-miRNA presenting functions of one or both DGCR8 proteins. Our results suggest that for certain miRNA, NCL can wrap around the double stranded miRNA molecule with two RBDs like DGCR8 (**Figure 9B**). Since the lengths of oncogenic miRNA transcripts are variable, we speculate that NCL may act as a bridging agent between DGCR8 and Drosha when processing longer transcripts (**Figure 9C**). Our findings present a snapshot of NCL-miRNA that give an initial insight into these interactions. We envision future studies to elaborate the NCL-miRNA interaction dynamics over longer time-scales to get a finer grained picture of the molecular mechanisms underlying these mechanisms and their downstream effects.

Drosha and DGCR8 interact with different RNA types including precursor-mRNA (pre-mRNA) and non-coding RNA and are also involved in double stranded DNA break repair mechanisms [97]. Since NCL and MPC proteins can interact in a non-miRNA context [21], it is quite likely that they cooperate in other biological pathways as well. Studies testing NCL- MPC cooperation in pre-mRNA processing may be a natural extension of this study since NCL is also known to interact with a list of mRNA UTR molecules to manipulate their expression levels in human cancers [20,26,27].

NCL cellular localization is highly complex and context-dependent. Pathophysiological functional implications of NCL are even more enigmatic. Despite this multidimensional behavior, NCL is a promising target for cancer therapeutics. Therapeutics such as the immuno-agents 4LB5-HP-RNase [98], G-rich DNA oligonucleotide, aptamer AS1411 [99], and antagonist pseudopeptides, N6L [100] and HB19 [101], target either surface or cytoplasmic NCL to regulate its functions in miRNA synthesis, RNA metabolism, cell proliferation, angiogenesis and metastasis, in a variety of cancer types including breast cancer.



In summary, we predict two putative binding modes where NCL RBD3-4 specifically drive NCL-miRNA interactions and an alternative binding mode where a small contribution from RBD12 is also involved. As we had hypothesized RNP motifs on RBD3-4 play a significant role in these interactions; additionally, we report novel residues important for the interaction that have not been identified in any other previous study. Importantly, our data support an idea that the exclusive presence of NCL RBD3-4 in animals might be evolutionarily relevant for NCL functions as drivers for microRNA processing. Our data delineate critical residues in NCL and recognition motifs in the miRNA important for NCL-miRNA interactions. Future studies designed to validate critical residues in these motifs that are important for interactions, using site-directed mutagenesis in cellular conditions will be required. Once confirmed experimentally, NCL-miRNA interacting interface provide a valuable drug targets for the development of cancer therapies to control specific gene expression.

### **Acknowledgements**

We acknowledge the contribution of Michael Scarpati, Rahimah Ahmad, and Yue Qui for the preliminary analysis that paved the way for this work. We are extremely grateful to Dr Aaron Frank and Dr Tamar Schlick for their valuable feedback and the critical review of this manuscript.

### **References**

- 1) Hentze M. W., Castello A., Schwarzl T., Preiss T. (2018). A brave new world of RNA-binding proteins. *Nat. Rev. Mol. Cell Biol.* 19 327–341. [DOI](#) - [PubMed](#)
- 2) Gebauer F., Schwarzl T., Valcarcel J., Hentze M.W. RNA-binding proteins in human genetic disease. *Nat. Rev. Genet.* 2020:416–425. doi: 10.1038/s41576-020-00302-y. [PubMed](#) [CrossRef](#) [Google Scholar](#)
- 3) Wang ZL, Li B, Luo YX, Lin Q, Liu SR, Zhang XQ, et al. Comprehensive Genomic Characterization of RNA-Binding Proteins across Human Cancers. *Cell Rep* (2018) 22(1):286–98. - [DOI](#) - [PubMed](#)

- 4) Neelamraju Y, Gonzalez-Perez A, Bhat-Nakshatri P, Nakshatri H, Janga SC. Mutational landscape of RNA-binding proteins in human cancers. *RNA Biol.* 2018; 15:115–29. 10.1080/15476286.2017.1391436 [[PMC free article](#)] [[PubMed](#)] [[CrossRef](#)] [[Google Scholar](#)]
- 5) Gebauer F., Schwarzl T., Valcárcel J., Hentze M. W. (2020). RNA-binding proteins in human genetic disease. *Nat. Rev. Genet* 22 185–198. - [PubMed](#). doi: 10.1038/s41576-020-00302-y.
- 6) Pereira B, Billaud M, Almeida R. RNA-Binding Proteins in Cancer: Old Players and New Actors. *Trends Cancer* (2017) 3(7):506–28. 10.1016/j.trecan.2017.05.003 - [DOI](#) - [PubMed](#)
- 7) Ray D., Kazan H., Cook K.B., Weirauch M.T., Najafabadi H.S., Li X., Gueroussov S., Albu M., Zheng H., Yang A., et al. A compendium of RNA-binding motifs for decoding gene regulation. *Nature*. 2013;499:172–177. doi: 10.1038/nature12311. [[PMC free article](#)] [[PubMed](#)] [[CrossRef](#)] [[Google Scholar](#)]
- 8) Dassi E. Handshakes and Fights: The regulatory interplay of RNA-binding proteins. *Front Mol Biosci.* 2017;4:67. doi: 10.3389/fmolb.2017.00067. [[PMC free article](#)] [[PubMed](#)] [[CrossRef](#)] [[Google Scholar](#)]
- 9) Burd C.G., Dreyfuss G. Conserved structures and diversity of functions of RNA-binding proteins. *Science*. 1994;265:615–621. doi: 10.1126/science.8036511. - [DOI](#) - [PubMed](#)
- 10) Maris C, Dominguez C, Allain FH. The RNA recognition motif, a plastic RNA-binding platform to regulate post-transcriptional gene expression. *FEBS J.* 2005;272:2118–2131. doi: 10.1111/j.1742-4658.2005.04653.x. - [DOI](#) - [PubMed](#)
- 11) Wilson, K.A., Holland, D.J., and Wetmore, S.D. (2016). Topology of RNA-protein nucleobase-amino acid  $\pi$ - $\pi$  interactions and comparison to analogous DNA-protein  $\pi$ - $\pi$  contacts. *RNA* 22, 696–708. - [PubMed](#) - [PMC](#) - [DOI](#)

- 12) H Kooshapur, Choudhury NR Simon B. et al. Structural basis for terminal loop recognition and stimulation of pri-miRNA-18a processing by hnRNP A1. *Nature Communications*. 2018;9(1):1–17. - [PMC](#) - [PubMed](#)
- 13) Mayeda A., Munroe S.H., Cáceres J.F., Krainer A.R. Function of conserved domains of hnRNP A1 and other hnRNP A/B proteins. *Embo J*. 1994;13:5483–5495. doi: 10.1002/j.1460-2075.1994.tb06883.x. - [DOI](#) - [PMC](#) - [PubMed](#)
- 14) Nam Y, Chen C, Gregory RI, Chou JJ, Sliz P. Molecular basis for interaction of let-7 microRNAs with Lin28. *Cell*. 2011;147:1080–1091. - [PMC](#) - [PubMed](#)
- 15) Daniely Y., Dimitrova D.D., Borowiec J.A. Stress-dependent nucleolin mobilization mediated by p53-nucleolin complex formation. *Mol. Cell Biol*. 2002;22:6014–6022. doi: 10.1128/MCB.22.16.6014-6022.2002. - [DOI](#) - [PMC](#) - [PubMed](#)
- 16) Ginisty H, Amalric F, Bouvet P. Nucleolin functions in the first step of ribosomal RNA processing. *EMBO J* 1998; 17: 1476–1486. [[PMC free article](#)] [[PubMed](#)] [[Google Scholar](#)]
- 17) Angelov D., Bondarenko V.A., Almagro S., Menoni H., Mongélard F., Hans F., Mietton F., Studitsky V.M., Hamiche A., Dimitrov S., Bouvet P. Nucleolin is a histone chaperone with FACT-like activity and assists remodeling of nucleosomes. *EMBO J*. 2006;25:1669–1679. - [PMC](#) - [PubMed](#)
- 18) Sengupta TK, Bandyopadhyay S, Fernandes DJ, Spicer EK (2004) Identification of nucleolin as an AU-rich element binding protein involved in bcl-2 mRNA stabilization. *J Biol Chem* 279(12):10855–10863. <https://doi.org/10.1074/jbc.M309111200> - [DOI](#) - [PubMed](#)
- 19) Hung C. Y., Yang W. B., Wang S. A., Hsu T. I., Chang W. C., Hung J. J. Nucleolin enhances internal ribosomal entry site (IRES)-mediated translation of Sp1 in tumorigenesis. *Biochimica et Biophysica Acta*. 2014;1843(12):2843–2854. doi: 10.1016/j.bbamcr.2014.08.009. - [DOI](#) - [PubMed](#)

- 20) Takagi M., Absalon M. J., McLure K. G., Kastan M. B. (2005). Regulation of p53 translation and induction after DNA damage by ribosomal protein L26 and nucleolin. *Cell* 123 49–63. 10.1016/j.cell.2005.07.034 - [DOI](#) - [PubMed](#)
- 21) Pickering B.F., Yu D., Van Dyke M.W. Nucleolin protein interacts with microprocessor complex to affect biogenesis of microRNAs 15a and 16. *J. Biol. Chem.* 2011;286:44095–44103. doi: 10.1074/jbc.M111.265439. - [DOI](#) - [PMC](#) - [PubMed](#)
- 22) Abdelmohsen K., Gorospe M. (2012). RNA-binding protein nucleolin in disease. *RNA Biol.* 9 799–808. 10.4161/rna.19718 - [DOI](#) - [PMC](#) - [PubMed](#)
- 23) Bouvet P., Diaz J. J., Kindbeiter K., Madjar J. J., Amalric F. (1998). Nucleolin interacts with several ribosomal proteins through its RGG domain. *J. Biol. Chem.* 273 19025–19029. 10.1074/jbc.273.30.19025 - [DOI](#) - [PubMed](#)
- 24) Bhatt P., d'Avout C., Kane N. S., Borowiec J. A., Saxena A. (2012). Specific domains of nucleolin interact with Hdm2 and antagonize Hdm2-mediated p53 ubiquitination. *FEBS J.* 279 370–383. 10.1111/j.1742-4658.2011.08430.x - [DOI](#) - [PMC](#) - [PubMed](#)
- 25) Ginisty H, Sicard H, Roger B et al. . Structure and functions of nucleolin. *J Cell Sci* 1999; 112: 761–72. - [PubMed](#)
- 26) Chen J., Guo K., Kastan M. B. (2012). Interactions of nucleolin and ribosomal protein L26 (RPL26) in translational control of human p53 mRNA. *J. Biol. Chem.* 287, 16467–16476. 10.1074/jbc.M112.349274 - [DOI](#) - [PMC](#) - [PubMed](#)
- 27) Woo HH, Baker T, Laszlo C, Chambers SK. Nucleolin Mediates MicroRNA-directed CSF-1 mRNA Deadenylation but Increases Translation of CSF-1 mRNA. *Mol Cell Proteomics.* 2013;12:1661–77. - [DOI](#) - [PMC](#) - [PubMed](#)

- 28) Iden M, Fye S, Li K, Chowdhury T, Ramchandran R, Rader JS. The lncRNA PVT1 Contributes to the Cervical Cancer Phenotype and Associates with Poor Patient Prognosis. *PloS One* (2016) 11(5):e0156274. [10.1371/journal.pone.0156274](https://doi.org/10.1371/journal.pone.0156274) - [DOI](#) - [PMC](#) - [PubMed](#)
- 29) Shen Y, Liu S, Fan J, Jin Y, Tian B, Zheng X, et al. Nuclear retention of the lncRNA SNHG1 by doxorubicin attenuates hnRNP-p53 protein interactions. *EMBO Rep* (2017) 18(4):536–48. [10.15252/embr.201643139](https://doi.org/10.15252/embr.201643139) - [DOI](#) - [PMC](#) - [PubMed](#)
- 30) Ishimaru D., Zuraw L., Ramalingam S., et al. Mechanism of regulation of bcl-2 mRNA by nucleolin and A + U-rich element-binding factor 1 (AUF1) *Journal of Biological Chemistry*. 2010;285(35):27182–27191. doi: [10.1074/jbc.M109.098830](https://doi.org/10.1074/jbc.M109.098830). - [DOI](#) - [PMC](#) - [PubMed](#)
- 31) Abdelmohsen K, Tominaga K, Lee EK, Srikantan S, Kang M-J, Kim MM, Selimyan R, Martindale JL, Yang X, Carrier F, Zhan M, Becker KG, Gorospe M (2011) Enhanced translation by Nucleolin via G-rich elements in coding and non-coding regions of target mRNAs. *Nucleic Acids Res* 39(19):8513–8530. [DOI](#) - [PubMed](#) - [PMC](#)
- 32) Chang Q, Bhatia D, Zhang Y, Meighan T, Castranova V, Shi X, Chen F. Incorporation of an internal ribosome entry site-dependent mechanism in arsenic-induced GADD45 alpha expression. *Cancer Res*. 2007;67:6146–6154. - [PubMed](#)
- 33) Ginisty H, Amalric F, Bouvet P. Two different combinations of RNA-binding domains determine the RNA binding specificity of nucleolin. *J. Biol. Chem.* 2001;276:14338–14343. doi: [10.1074/jbc.M011120200](https://doi.org/10.1074/jbc.M011120200). - [DOI](#) - [PubMed](#)
- 34) Nana-Sinkam SP, Croce CM. MicroRNA regulation of tumorigenesis, cancer progression and interpatient heterogeneity: towards clinical use. *Genome Biol*. 2014;15:445. doi: [10.1186/s13059-014-0445-8](https://doi.org/10.1186/s13059-014-0445-8). - [DOI](#) - [PMC](#) - [PubMed](#)
- 35) Lund E. (2004). Nuclear export of MicroRNA precursors. *Science* 303, 95–98. [10.1126/science.1090599](https://doi.org/10.1126/science.1090599), PMID: - [DOI](#) - [PubMed](#)

- 36) Bernstein E., Caudy A. A., Hammond S. M., Hannon G. J. (2001). Role for a bidentate ribonuclease in the initiation step of RNA interference. *Nature* 409 363–366. 10.1038/35053110 - [DOI](#) - [PubMed](#)
- 37) Song, L., Han, M. H., Lesicka, J. & Fedoroff, N. Arabidopsis primary microRNA processing proteins HYL1 and DCL1 define a nuclear body distinct from the Cajal body. *Proc. Natl Acad. Sci. USA* 104, 5437–5442 (2007). - [PubMed](#) - [DOI](#) - [PMC](#)
- 38) Bologna NG, Schapire AL, Palatnik JF. Processing of plant microRNA precursors. *Brief Funct Genomics*. 2012;12:37–45. doi: 10.1093/bfgp/els050. - [DOI](#) - [PubMed](#)
- 39) Meier D., Kruse J., Buttler J., Friedrich M., Zenk F., Boesler B., Förstner K.U., Hammann C., Nellen W.. Analysis of the microprocessor in Dictyostelium: The role of RbdB, a dsRNA binding protein. *PLoS Genet*. 2016; 12:e1006057. - [PMC](#) - [PubMed](#)
- 40) Pichiorri F, Palmieri D, De Luca L, Consiglio J, You J, Rocci A, Talabere T, Piovan C, Lagana A, Cascione L, Guan J, Gasparini P, Balatti V, Nuovo G, Coppola V, Hofmeister CC, Marcucci G, Byrd JC, Volinia S, Shapiro CL, Freitas MA, Croce CM (2013) In vivo NCL targeting affects breast cancer aggressiveness through miRNA regulation. *J Exp Med* 210(5):951–968. - [DOI](#) - [PubMed](#) - [PMC](#)
- 41) Kumar S, et al. Integrated analysis of mRNA and miRNA expression in HeLa cells expressing low levels of Nucleolin. *Sci. Rep.* 2017;7:9017. doi: 10.1038/s41598-017-09353-4. - [DOI](#) - [PMC](#) - [PubMed](#)
- 42) Gongol B., Marin T., Zhang J., Wang S. C., Sun W., He M., et al. (2019). Shear stress regulation of miRNA-93 and miRNA-484 maturation through nucleolin. *Proc. Natl. Acad. Sci. U.S.A.* 116 12974–12979. 10.1073/pnas.1902844116 - [DOI](#) - [PMC](#) - [PubMed](#)
- 43) Lyu *et al.* (2018) MicroRNA Profiling of Transgenic Mice with Myocardial Overexpression of Nucleolin. *Chin Med J (Engl)* . 2018 Feb 5;131(3):339-346. doi: 10.4103/0366-6999.223853.
- 44) Arumugam S. et al.. Solution structure of the RBD1,2 domains from human nucleolin. *J. Biomol. NMR* 47, 79–83 (2010). - [PubMed](#)

- 45) Allain F. H.-T., Gilbert D. E., Bouvet P., Feigon J. (2000). Solution structure of the two N-terminal RNA-binding domains of nucleolin and NMR study of the interaction with its RNA target. *J. Mol. Biol.* 303 227–241. 10.1006/jmbi.2000.4118 - [DOI](#) - [PubMed](#)
- 46) Nucleotide [Internet]. Bethesda (MD): National Library of Medicine (US), National Center for Biotechnology Information; [1988]. Accession No. NP\_005372 XP\_002342316, Homo sapiens nucleolin (NCL); [cited 2021 04 15]. Available from <https://pubmed.ncbi.nlm.nih.gov/26615191/>
- 47) Schultz J., Copley R. R., Doerks T., Ponting C. P., Bork P. (2000). SMART: a web-based tool for the study of genetically mobile domains. *Nucleic Acids Res.* 28 231–234. 10.1093/nar/28.1.231 - [DOI](#) - [PMC](#) - [PubMed](#)
- 48) El-Gebali S, et al. The Pfam protein families database in 2019. *Nucleic Acids Res.* 2019;47:D427–D432. doi: 10.1093/nar/gky995. - [DOI](#) - [PMC](#) - [PubMed](#)
- 49) The Uniprot C. (2017). UniProt: the Universal Protein Knowledgebase. *Nucleic Acids Res.* 45, D158–D169. 10.1093/nar/gkw1099 - [DOI](#) - [PMC](#) - [PubMed](#)
- 50) Hunter, S. et al. InterPro: the integrative protein signature database. *Nucleic Acids Res.* 37, D211–D215 (2009). - [PubMed](#) - [DOI](#)
- 51) Sievers F., Wilm A., Dineen D., Gibson T. J., Karplus K., Li W., et al. (2011). Fast, scalable generation of high-quality protein multiple sequence alignments using Clustal Omega. *Mol. Syst. Biol.* 7:539. 10.1038/msb.2011.75 - [DOI](#) - [PMC](#) - [PubMed](#)
- 52) Robert X, Gouet P. Deciphering key features in protein structures with the new ENDscript server. *Nucleic Acids Res.* 2014;42:W320–W324. doi: 10.1093/nar/gku316. - [DOI](#) - [PMC](#) - [PubMed](#)
- 53) Waterhouse, A. et al. SWISS-MODEL: homology modelling of protein structures and complexes. *Nucleic Acids Res.* 46, W296–W303 (2018). - [PubMed](#) - [PMC](#) - [DOI](#)
- 54) McGuffin L.J., Adiyaman R., Maghrabi A.H.A., Shuid A.N., Brackenridge D.A., Nealon J.O., Philomina L.S. IntFOLD: An Integrated Web Resource for High Performance Protein Structure and Function

- Prediction. *Nucleic Acids Res.* 2019;47:W408–W413. doi: 10.1093/nar/gkz322. - [DOI](#) - [PMC](#) - [PubMed](#)
- 55) Kelley LA, Mezulis S, Yates CM, Wass MN, Sternberg MJ. The Phyre2 web portal for protein modeling, prediction and analysis. *Nat Protoc* (2015) 10(6):845–58. 10.1038/nprot.2015.053 - [DOI](#) - [PMC](#) - [PubMed](#)
- 56) Kim D.E., Chivian D., Baker D. Protein structure prediction and analysis using the Robetta server. *Nucleic Acids Res.* 2004;32:W526–W531. - [PMC](#) - [PubMed](#)
- 57) Xu D, Zhang Y. Ab initio protein structure assembly using continuous structure fragments and optimized knowledge-based force field. *Proteins.* 2012;80:1715–1735. doi: 10.1002/prot.24065. - [DOI](#) - [PMC](#) - [PubMed](#)
- 58) Yang, J. et al. The I-TASSER suite: protein structure and function prediction. *Nat. Methods* 12, 7–8 (2015). - [PubMed](#) - [PMC](#) - [DOI](#)
- 59) Eisenberg D., Lüthy R., Bowie J. U. (1997). VERIFY3D: Assessment of protein models with three-dimensional profiles. *Methods Enzymol.* 277 396–404. 10.1016/S0076-6879(97)77022-8 - [DOI](#) - [PubMed](#)
- 60) Olechnovič K., Venclovas Č.. VoroMQA: assessment of protein structure quality using interatomic contact areas. *Proteins.* 2017; 85:1131–1145. - [PubMed](#)
- 61) Wiederstein M, Sippl MJ. ProSA-web: interactive web service for the recognition of errors in three-dimensional structures of proteins. *Nucleic Acids Res.* 2007;35:W407–410. doi: 10.1093/nar/gkm290. - [DOI](#) - [PMC](#) - [PubMed](#)
- 62) Uziela K., Menéndez Hurtado D., Shu N., Wallner B., Elofsson A. (2017). ProQ3D: Improved Model Quality Assessments Using Deep Learning. *Bioinformatics* 33 (10), 1578–1580. 10.1093/bioinformatics/btw819 - [DOI](#) - [PubMed](#)



- 63) Xu D., Zhang Y. Improving the physical realism and structural accuracy of protein models by a two-step atomic-level energy minimization. *Biophys. J.* 2011;101:2525–2534. - [PMC](#) - [PubMed](#)
- 64) Krivov GG, Shapovalov MV, Dunbrack RL. Improved prediction of protein side-chain conformations with SCWRL4. *Proteins.* 2009;77:778–795. doi: 10.1002/prot.22488. - [DOI](#) - [PMC](#) - [PubMed](#)
- 65) Chirayil, S., Wu, Q., Amezcua, C. & Luebke, K. J. NMR characterization of an oligonucleotide model of the miR-21 pre-element. *PLoS ONE* 9, e108231 (2014). - [PubMed](#) - [PMC](#)
- 66) Shortridge MD, Walker MJ, Pavelitz T, Chen Y, Yang W, Varani G. A macrocyclic peptide ligand binds the oncogenic MicroRNA-21 precursor and suppresses dicer processing. *ACS Chem. Biol.* 2017;12:1611–1620. doi: 10.1021/acscchembio.7b00180. - [DOI](#) - [PMC](#) - [PubMed](#)
- 67) Kozomara A, Birgaoanu M, Griffiths-Jones S. miRBase: From microRNA Sequences to Function. *Nucleic Acids Res* (2019) 47:D155–62. 10.1093/nar/gky1141 - [DOI](#) - [PMC](#) - [PubMed](#)
- 68) Reuter J.S., Mathews D.H.. RNAstructure: software for RNA secondary structure prediction and analysis. *BMC Bioinformatics.* 2010; 11:129. - [PMC](#) - [PubMed](#)
- 69) Gruber A. R., Lorenz R., Bernhart S. H., Neuböck R., Hofacker I. L., The Vienna RNA websuite. *Nucleic Acids Res.* 36, W70–W74 (2008). - [PMC](#) - [PubMed](#)
- 70) Parisien M, Major F. The MC-fold and MC-Sym pipeline infers RNA structure from sequence data. *Nature.* 2008;452:51–55. doi: 10.1038/nature06684. - [DOI](#) - [PubMed](#)
- 71) Sato K, Hamada M, Asai K, Mituyama T. CentroidFold: a web server for RNA secondary structure prediction. *Nucleic Acids Res.* 2009;37:277–280. doi: 10.1093/nar/gkp367. - [DOI](#) - [PMC](#) - [PubMed](#)
- 72) Singh J, Hanson J, Paliwal K, Zhou YQ. RNA secondary structure prediction using an ensemble of two-dimensional deep neural networks and transfer learning. *Nat. Commun.* 2019;10:5407. doi: 10.1038/s41467-019-13395-9. - [DOI](#) - [PMC](#) - [PubMed](#)
- 73) Biesiada M.; Purzycka K. J.; Szachniuk M.; Blazewicz J.; Adamiak R. W. Automated RNA 3D Structure Prediction with RNAComposer. *Methods Mol. Biol.* 2016, 1490, 199–215. - [PubMed](#)

- 74) Sharma S, Ding F, Dokholyan NV. iFoldRNA: three-dimensional RNA structure prediction and folding. *Bioinformatics*. 2008;24:1951–1952. doi: 10.1093/bioinformatics/btn328. - [DOI](#) - [PMC](#) - [PubMed](#)
- 75) Garcia-Martin J.A., Clote P., Dotu I.. RNAiFold: a web server for RNA inverse folding and molecular design. *Nucleic Acids Res*. 2013; 41:W465–W470. - [PMC](#) - [PubMed](#)
- 76) Wang, J., Wang, J., Huang, Y. & Xiao, Y. 3dRNA v2.0: an updated web server for RNA 3D structure prediction. *Int. J. Mol. Sci.*20, 4116 (2019). - [PMC](#) - [PubMed](#)
- 77) Magnus M, Boniecki MJ, Dawson W, Bujnicki JM. SimRNAweb: a web server for RNA 3D structure modeling with optional restraints. *Nucleic Acids Res*. 2016;44:W315–W319. doi: 10.1093/nar/gkw279. - [DOI](#) - [PMC](#) - [PubMed](#)
- 78) Chen VB, et al. MolProbity: all-atom structure validation for macromolecular crystallography. *Acta Crystallogr. D Biol. Crystallogr*. 2010;66:12–21. doi: 10.1107/S0907444909042073. - [DOI](#) - [PMC](#) - [PubMed](#)
- 79) Antczak M., Zok T., Osowiecki M., Popenda M., Adamiak R.W., Szachniuk M.. RNAfitme: a webserver for modeling nucleobase and nucleoside residue conformation in fixed-backbone RNA structures. *BMC Bioinformatics*. 2018; 19:304. - [PMC](#) - [PubMed](#)
- 80) Yan Y, Zhang D, Zhou P, Li B, Huang SY. HDock: A web server for protein-protein and protein-DNA/RNA docking based on a hybrid strategy. *Nucleic Acids Res*. 2017;45:W365–W373. doi: 10.1093/nar/gkx407. - [DOI](#) - [PMC](#) - [PubMed](#)
- 81) Tuszynska I, Magnus M, Jonak K et al (2015) NPdock: a web server for protein–nucleic acid docking. *Nucleic Acids Res* 43:W425–W430 - [PubMed](#) - [PMC](#) - [DOI](#)
- 82) DeLano WL. The PyMOL Molecular Graphics System. 2008. <http://pymol.org>
- 83) Laskowski RA, Jabłońska J, Pravda L, Vařeková RS, Thornton JM (2018) PDBsum: Structural summaries of PDB entries. *Protein Sci* 27: 129–134. 10.1002/pro.3289 - [DOI](#) - [PMC](#) - [PubMed](#)

- 84) Livi CM, Klus P, Delli Ponti R, Tartaglia GG. catRAPID signature: identification of ribonucleoproteins and RNA-binding regions. *Bioinformatics*. 2016;32:773–775. doi: 10.1093/bioinformatics/btv629. - [DOI](#) - [PMC](#) - [PubMed](#)
- 85) Dang, W., Muto, Y., Inoue, M., Kigawa, T., Shirouzu, M., Terada, T., Yokoyama, S. Solution structure of the RRM\_1 domain of NCL protein (Unpublished studies) RIKEN Structural Genomics/Proteomics Initiative (RSGI)
- 86) Allain F.H., Bouvet P., Dieckmann T., Feigon J.. Molecular basis of sequence-specific recognition of pre-ribosomal RNA by nucleolin. *EMBO J*. 2000; 19:6870–6881. - [PMC](#) - [PubMed](#)
- 87) Varani G., McClain W.H.. The G x U wobble base pair. A fundamental building block of RNA structure crucial to RNA function in diverse biological systems. *EMBO Rep*. 2000; 1:18–23. - [PMC](#) - [PubMed](#)
- 88) Li S, Nguyen TD, Nguyen TL, Nguyen TA. Mismatched and wobble base pairs govern primary microRNA processing by human microprocessor. *Nat. Commun*. 2020;11:1926. - [PMC](#) - [PubMed](#)
- 89) Auyeung VC, Ulitsky,McGeary ISE, et al. Beyond secondary structure: primary-sequence determinants license pri-miRNA hairpins for processing. *Cell*. 2013;152:844–58. doi: 10.1016/j.cell.2013.01.031. - [DOI](#) - [PMC](#) - [PubMed](#)
- 90) Fang W., Bartel D. P. (2015). The menu of features that define primary MicroRNAs and enable de novo design of MicroRNA genes. *Mol. Cell* 60 131–145. 10.1016/j.molcel.2015.08.015 - [DOI](#) - [PMC](#) - [PubMed](#)
- 91) Michlewski G.P., Cáceres J.F. Post-transcriptional control of miRNA biogenesis. *RNA*. 2019;25:1–16. doi: 10.1261/rna.068692.118. - [DOI](#) - [PMC](#) - [PubMed](#)
- 92) Michlewski G, Caceres JF. Antagonistic Role of Hnrnp A1 and KSRP in the Regulation of let-7a Biogenesis. *Nat Struct Mol Biol* (2010) 17(8):1011–8. 10.1038/nsmb.1874 - [DOI](#) - [PMC](#) - [PubMed](#)
- 93) Viswanathan SR, Daley GQ, Gregory RI.. 2008. Selective blockade of microRNA processing by Lin28. *Science*. 320:97–100. - [PMC](#) - [PubMed](#)

- 94) Kim KK, Yang Y, Zhu J, Adelstein RS, Kawamoto S. Rbfox3 controls the biogenesis of a subset of microRNAs. *Nature Structural & Molecular Biology*. 2014b;21:901–910. doi: 10.1038/nsmb.2892. - [DOI](#) - [PMC](#) - [PubMed](#)
- 95) Choudhury NR, et al. Tissue-specific control of brain-enriched miR-7 biogenesis. *Genes Dev*. 2013;27:24–38. doi: 10.1101/gad.199190.112. - [DOI](#) - [PMC](#) - [PubMed](#)
- 96) Partin A.C., Zhang K., Jeong B.C., Herrell E., Li S., Chiu W., Nam Y.. Cryo-EM structures of human Drosha and DGCR8 in complex with primary microRNA. *Mol. Cell*. 2020; 78:411–422. - [PMC](#) - [PubMed](#)
- 97) Pong S. K., Gullerova M. (2018). Noncanonical functions of microRNA pathway enzymes – Drosha, DGCR8, Dicer and Ago proteins. *FEBS Lett*. 592 2973–2986. 10.1002/1873-3468.13196 - [DOI](#) - [PubMed](#)
- 98) D’Avino C, Palmieri D, Braddom A, et al. A novel fully human anti-NCL immunorNase for triple-negative breast cancer therapy. *Oncotarget*. 2016;7(52):87016–87030. doi:10.18632/oncotarget.13522 - [DOI](#) - [PMC](#) - [PubMed](#)
- 99) Yazdian-Robati R., Bayat P., Oroojalian F., Zargari M., Ramezani M., Taghdisi S. M., et al. . (2019). Therapeutic applications of AS1411 aptamer, an update review. *Int. J. Biol. Macromol*. 155, 1420–1431. 10.1016/j.ijbiomac.2019.11.118 - [DOI](#) - [PubMed](#)
- 100) Ramos K. S., Moore S., Runge I., Tavera-Garcia M. A., Cascone I., Courty J., et al. . (2020). The nucleolin antagonist N6L inhibits LINE1 retrotransposon activity in non-small cell lung carcinoma cells. *J. Cancer* 11, 733–740. 10.7150/jca.37776 - [DOI](#) - [PMC](#) - [PubMed](#)
- 101) Birmpas C, Briand JP, Courty J, Katsoris P. The pseudopeptide HB-19 binds to cell surface nucleolin and inhibits angiogenesis. *Vasc Cell*. 2012;4:21. - [PMC](#) - [PubMed](#)

## Figure legends

**Figure 1. NCL tandem RBD models display high structural similarities with existing individual NCL RBD crystal structures. A)** Superposition of the modeled RBD1-4 (pale green) with individual crystal structures of NCL RBD1 (PDB ID: 1FJ7 ;marine blue), RBD2 (PDB ID: 1FJC deep salmon), RBD3 (PDB ID: 2FC9; Lightblue), and RBD4 (PDB ID: 2FC8; deep olive). RMSD scores for RBD1, RBD2, RBD3, and RBD4 are 3.594, 2.324, 1.775, and 2.442, respectively. **B)** Superposition of the modeled RBD3-4 (pale green) with individual structures of NCL RBD3 (PDB ID: 2FC9; Lightblue), and RBD4 (PDB ID: 2FC8; deep olive) RMSD scores for RBD3 and RBD4 are 0.956 and 1.753, respectively.

**Figure 2. Structural models of the miRNAs analyzed in this study.** Top ranked models for all 6 pri-miRNA (orange backbone with bases shown in blue). Alternative miRNA models that exhibited comparative evaluation profiles are shown in dark red.

**Figure 3. Representative docking poses exhibiting binding mode 1 involving RBD3-4. A)** Complete docking scenarios. **B)** Zoomed-in insets with intermolecular distances between residues indicated. miRNA molecule backbone (orange), RBD1 (marine blue), RBD2 (deep salmon), RBD3 (light blue), RBD4 (deep olive). The linker regions between RBDs 1 and 2, 3 and 4 are colored in green while the linker between RBDs 2 and 3 are colored in yellow. Interacting nucleotides on the miRNA and NCL-RBDs are indicated with deep teal and hot pink, respectively.

**Figure 4. Representative docking poses exhibiting binding mode 2 involving RBD4. A)** Complete docking scenarios. **B)** Zoomed in version with intermolecular distances between residues indicated. RBD1 (marine blue), RBD2 (deep salmon), RBD3 (light blue), RBD4 (deep olive) The linker regions between RBDs 1 and 2, 3 and 4 are colored in green while the linker between RBDs 2 and 3 are colored in yellow. Interacting nucleotides on the miRNA and NCL-RBDs are indicated with deep teal and hot pink, respectively.

**Figure 5. Representative docking poses exhibiting binding mode 3 involving RBD234.** **A)** Complete docking scenarios. **B)** Zoomed in version with intermolecular distances between residues indicated. RBD1 (marine blue), RBD2 (deep salmon), RBD3 (light blue), RBD4 (deep olive). The linker regions between RBDs 1 and 2, 3 and 4 are colored in green while the linker between RBDs 2 and 3 are colored in yellow. Interacting nucleotides on the miRNA and NCL-RBDs are indicated with deep teal and hot pink, respectively.

**Figure 6. NCL residues predicted to interact with miRNAs** **A) Comparison of hnRNP A1 RBDs with NCL RBDs** (PDB ID: 6DCL). Beta strands and RNP motifs are indicated with arrows. Known hnRNP A1 residues that interact with ssDNA and miR-18 are indicated in light brown background. NCL residues conserved in the equivalent positions are indicated in yellow background. Conserved residues are indicated in bold and black background. **B) Summary of NCL-RBD residues most frequently predicted to interact with miRNA based on docking.** Different types of interactions are indicated with background colors **C) Summary of predicted NCL-miRNA binding modes and a comparison with hnRNP A1-miRNA binding model.** **1)** Known hnRNP A1-mir18 interaction residues. **2)** Proposed NCL-miRNA binding mode 1 where both RBD3&RBD4 are involved in the interactions. **3)** Proposed NCL-miRNA binding mode 2 where RBD4 alone interacts with miRNA **4)** Proposed NCL-miRNA binding mode 3 which RBD3&4 and a single residue from RBD2. Beta sheets are numbered on top, and residues predicted to interact with miRNA are indicated in red. Newly identified residues are indicated in black. The numbers indicate the position of these residues in the corresponding beta strands.

**Figure 7. Location of non-canonical base pairing nucleotides and motifs in miRNA that interact with NCL-RBDs.** miRNA residues most frequently predicted to interact with NCL-RBDs are show in cyan for all

miRNA structures where pri-miRNA is shown in orange and region of the mature miRNA is shown in red. Non-canonical base pairs and kink-turns are indicated in dark purple.

**Figure 8. Mapping of miRNA residues interacting with NCL. A)** NCL contacts miRNA molecules at the UGU/GUG motifs closest to the loop. **B)** NCL contacts miRNA molecules on UGU/GUG motifs distant from the loop and closer to GHG/CUC motifs. **C)** NCL contacts longer miRNA molecules on UGU/GUG motifs slightly distant from the apical loop and closer to the loop stem. Beta strands are numbered on top of the arrowheads. RBD1 (marine blue), RBD2 (deep salmon), RBD3 (light blue), RBD4 (deep olive), and linker loops between RBDs (neon green). UGU/GUG motifs on miRNA that NCL interacts are indicated in green. miRNA residues that NCL interacts with are but is not part of an UGU/GUG motif is indicated in purple. UGU/GUG motifs on miRNA that NCL is not interacting are indicated in red. GHG/CUC motifs are indicated in orange.

**Figure 9. Canonical and proposed models of NCL, Drosha, and DGCR8 interactions with pri-miRNA molecules. A)** Canonical model involving Drosha & DGCR8 -1 and 2 [80] **B)** Hypothetical model A where NCL-RBDs could replace DGCR8 – 2 **C)** Hypothetical model B where all MPC proteins and either one or both NCL-RBDs interact with the pri-miRNA molecule. NCL-RBD3&4 are colored in light blue and deep olive, respectively. DROSHA is light green. DGCR8-1 is red, and DGCR8-2 is orange.

**Figure 1**

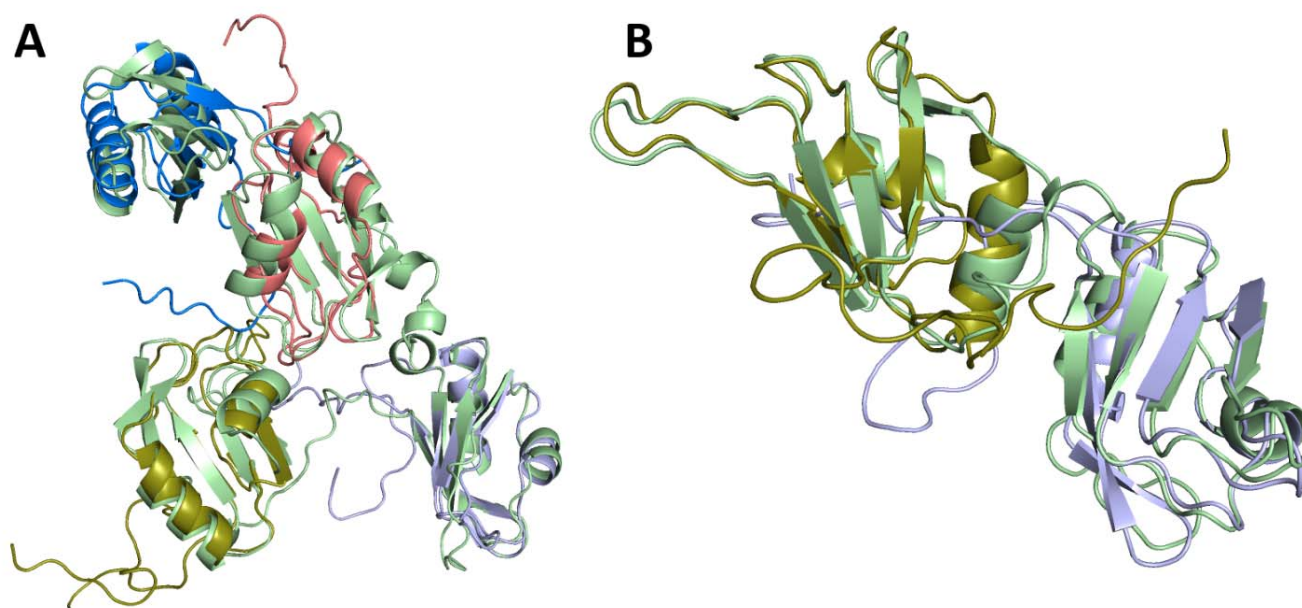

**Figure 2**

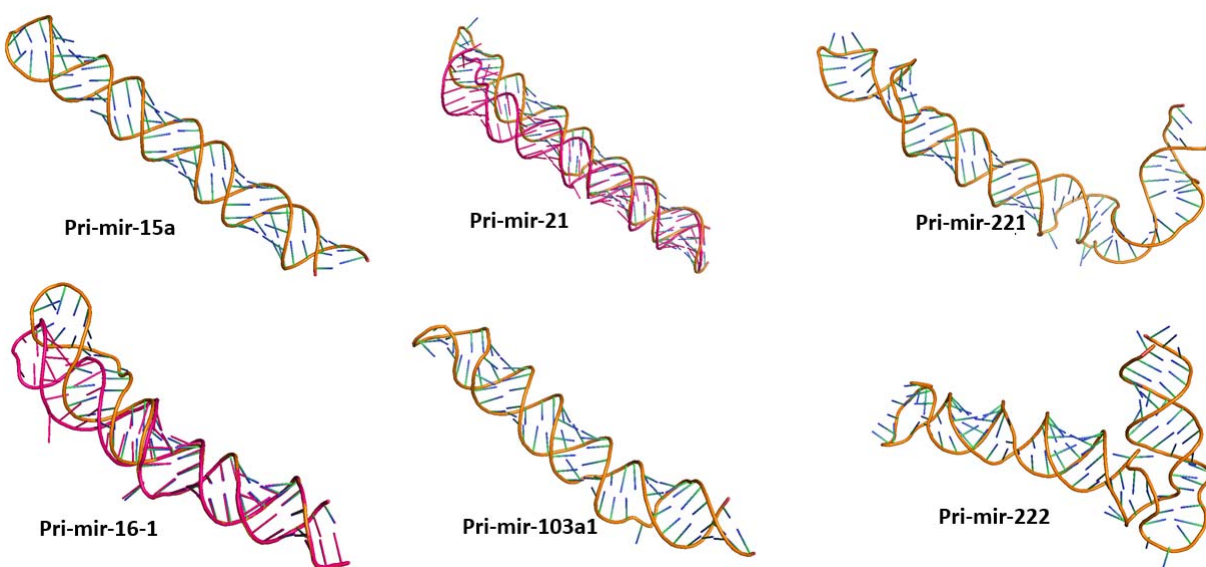



### Figure 3

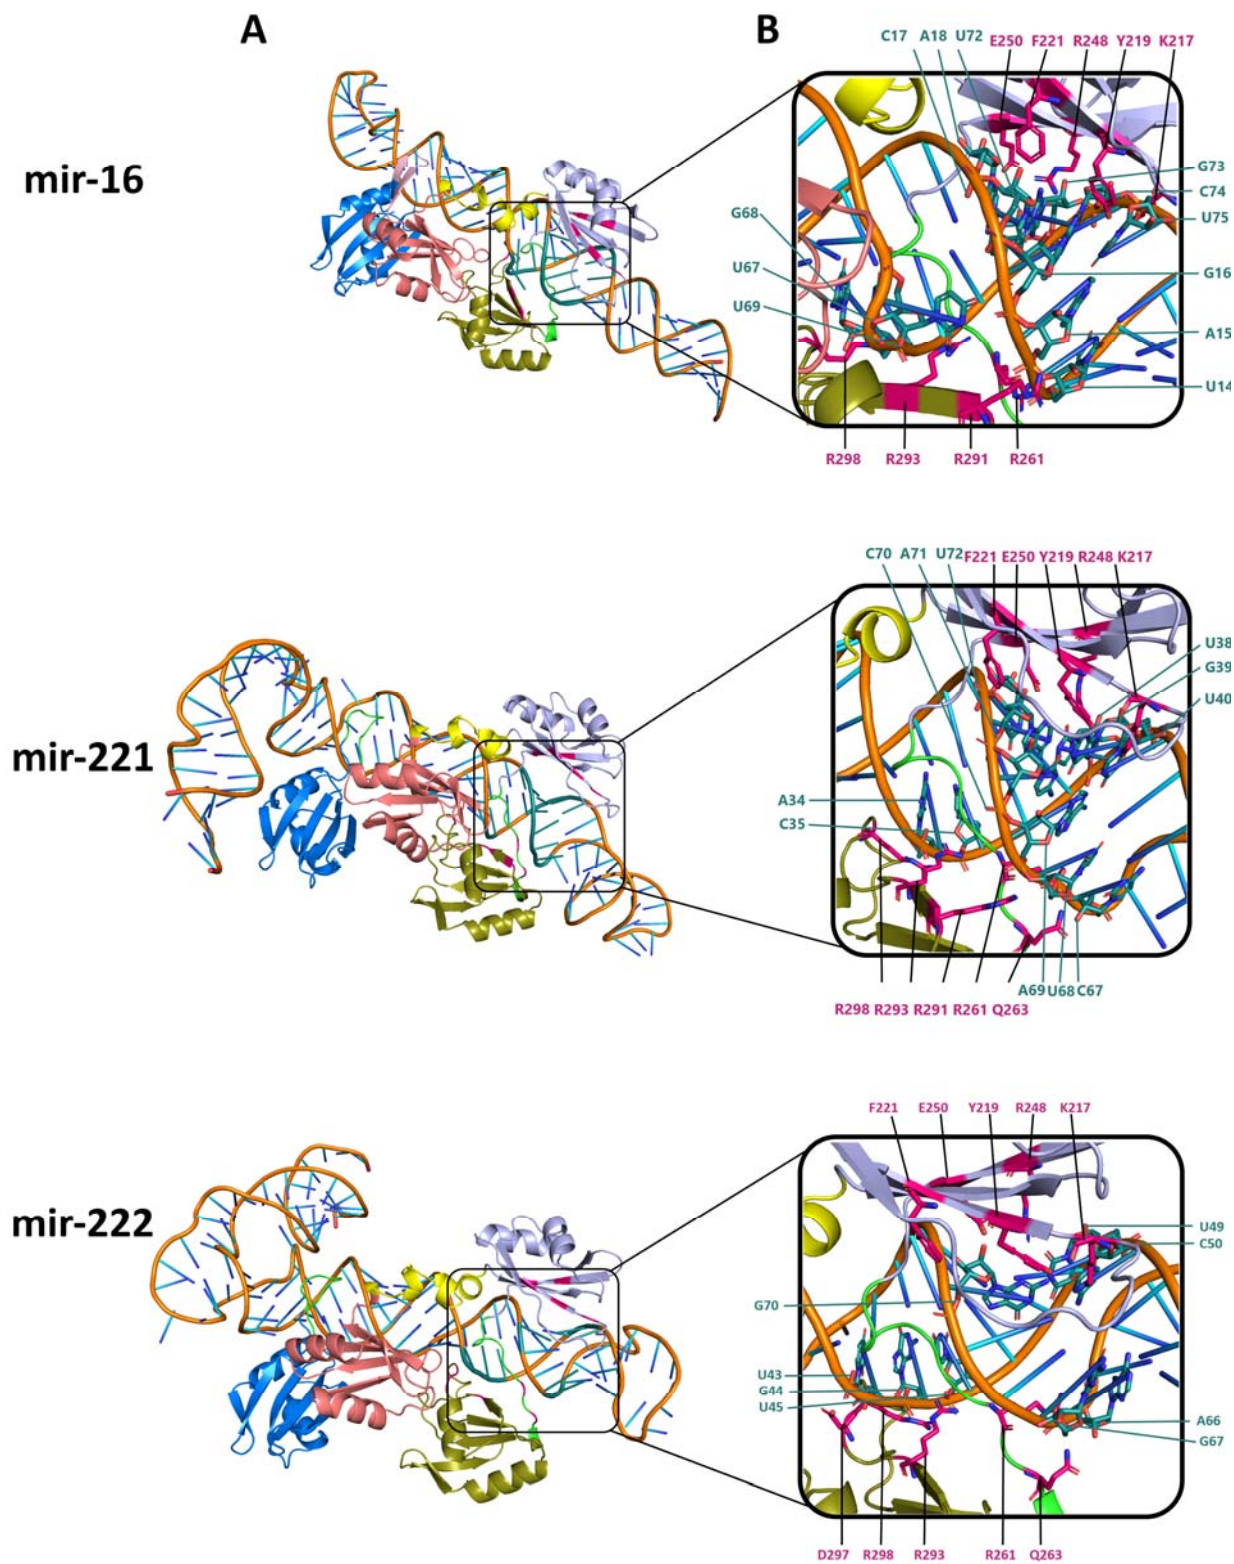

Figure 4

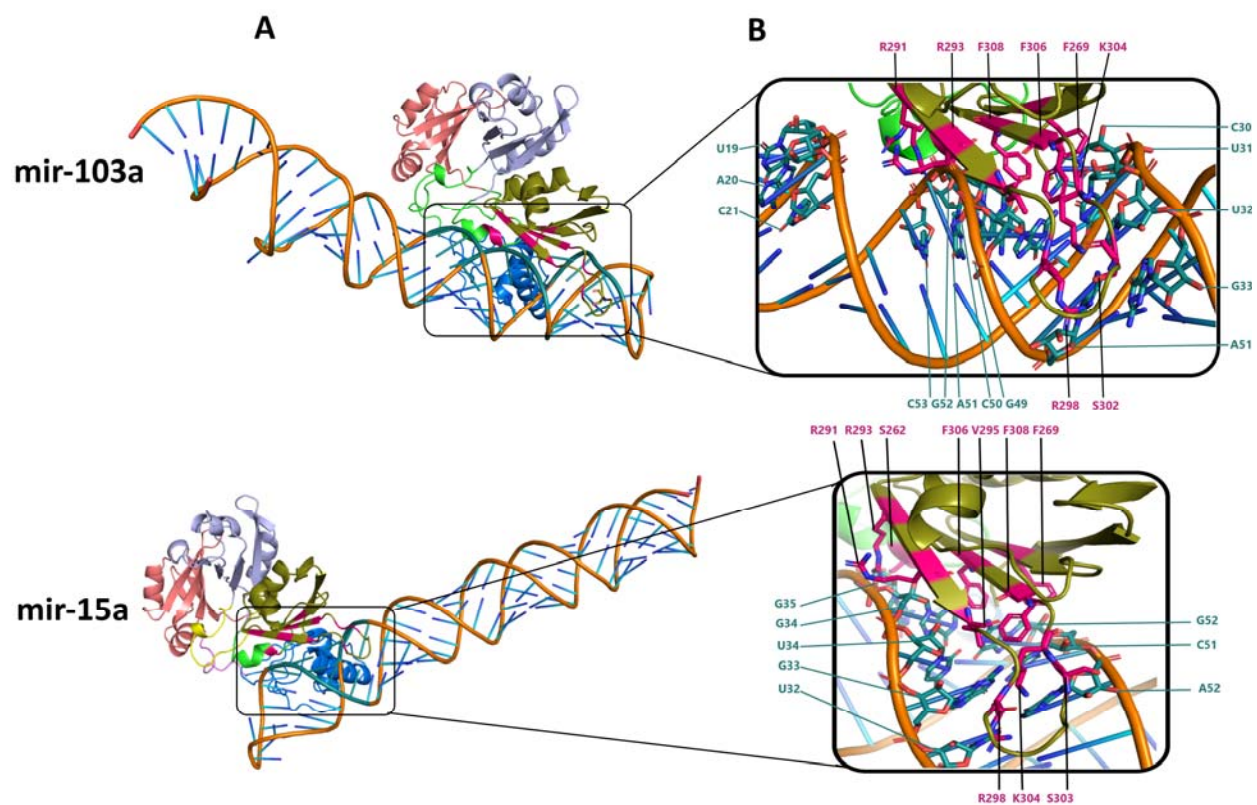

Figure 5

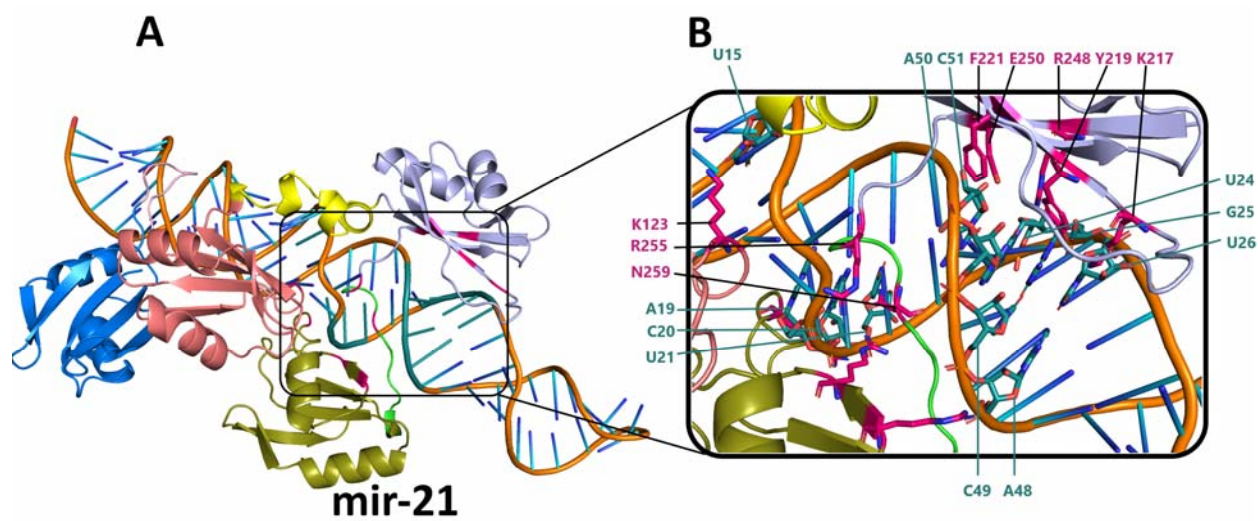

Figure 6

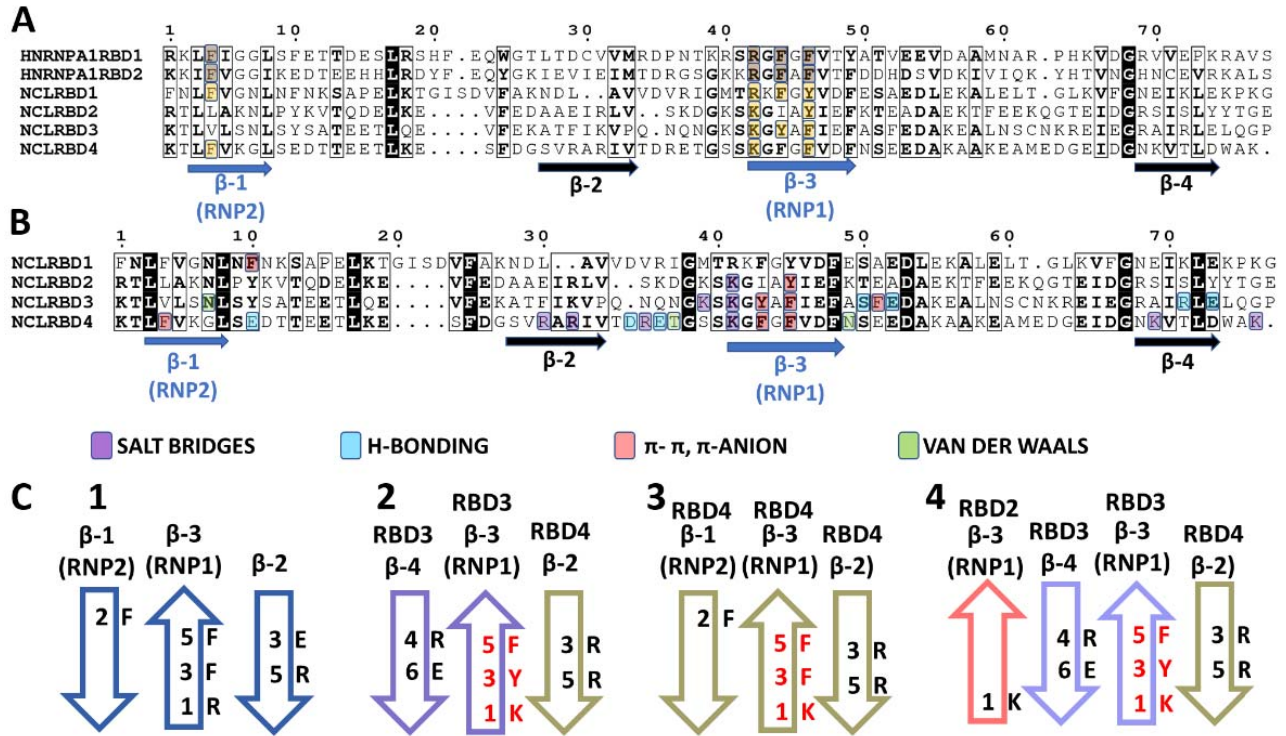

Figure 7

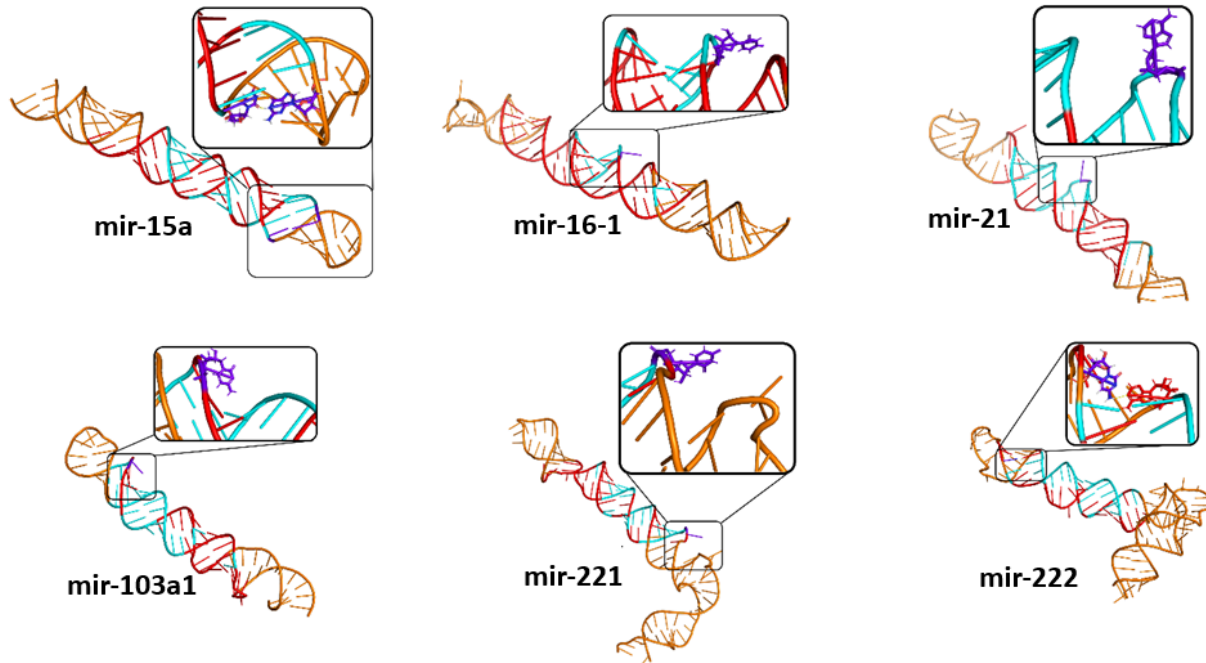

Figure 8

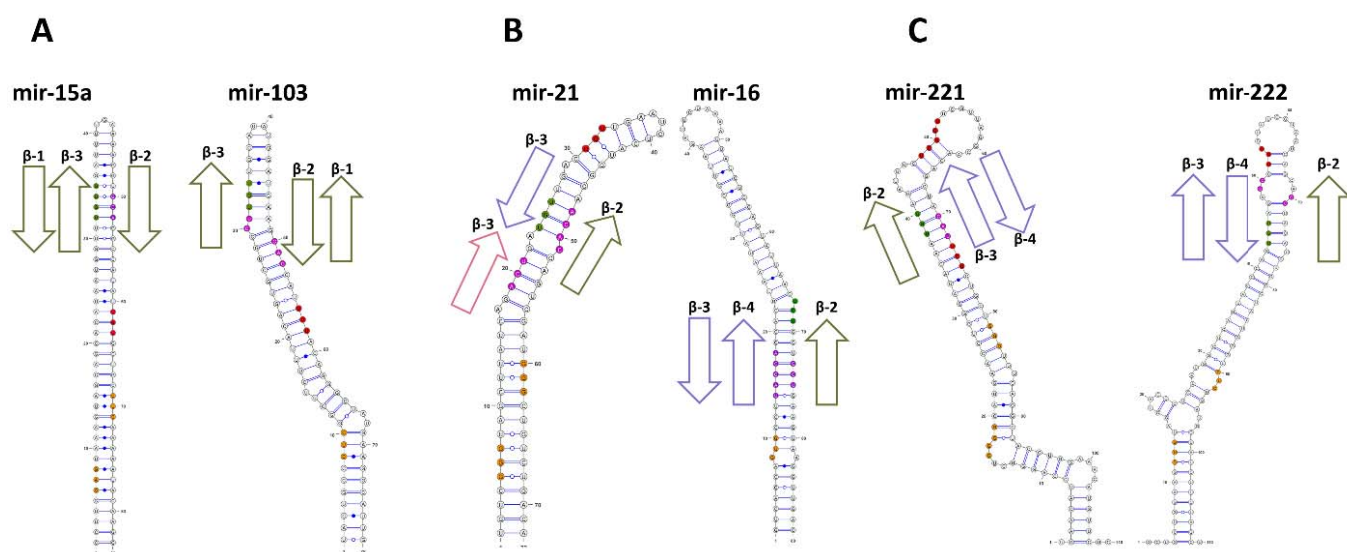

Figure 9

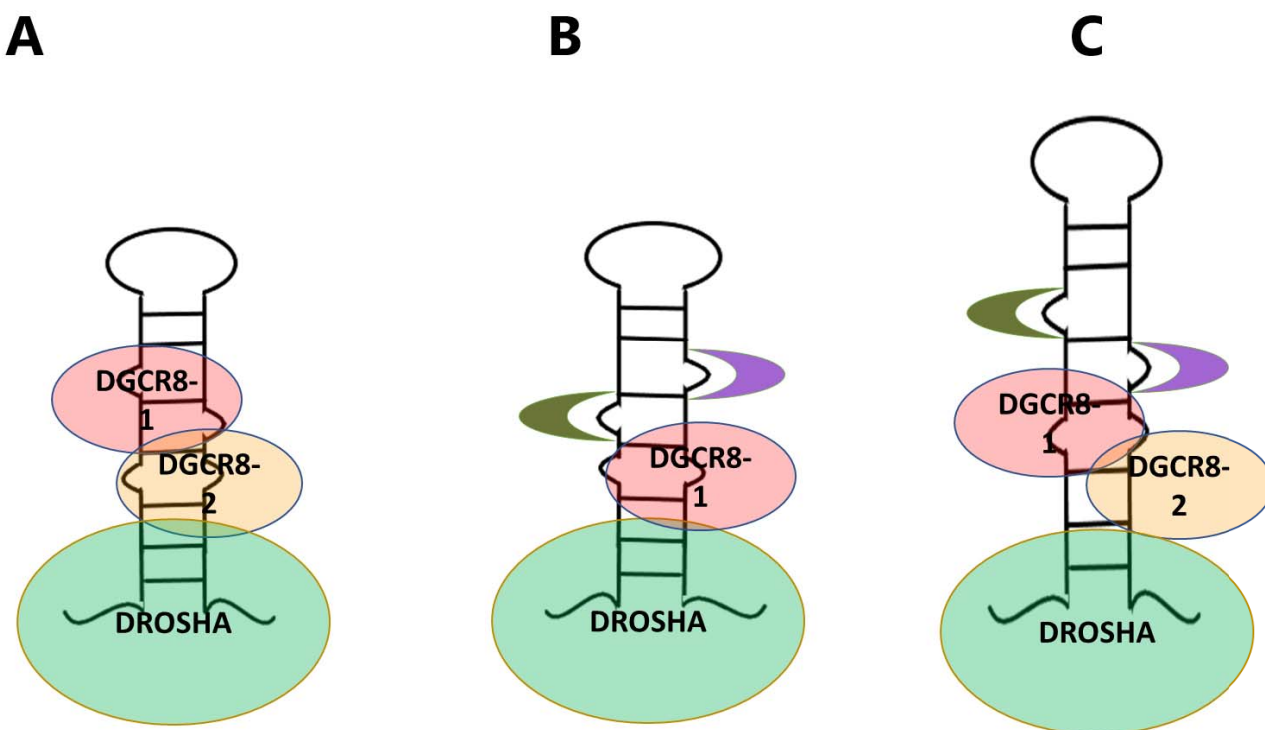

Source: http://biorxiv.org/content/10.1101/2021.06.09.447752v1.full.pdf
